# Supplementary material
Source: ML conference proceedings conference paper supplement (https://openreview.net/forum?id=qqDeICpLFo)

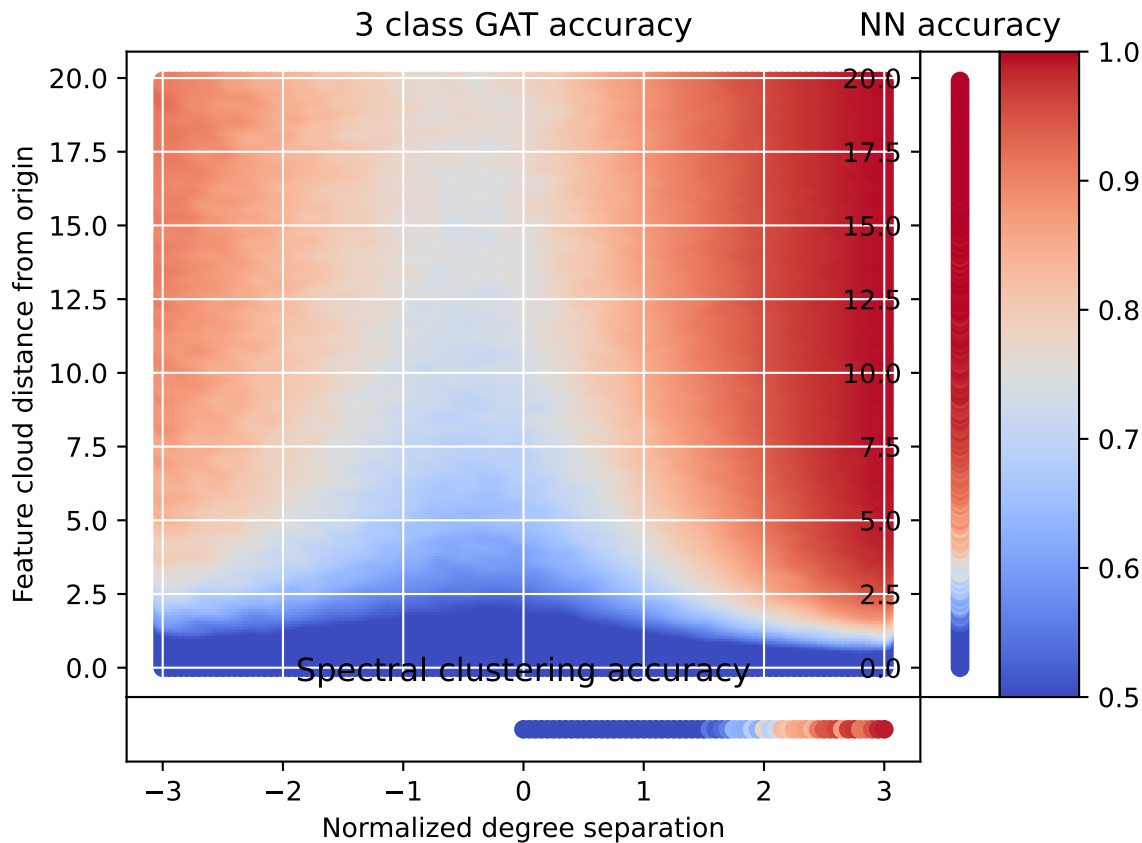

Supplement: supplementary_material [file attachment]

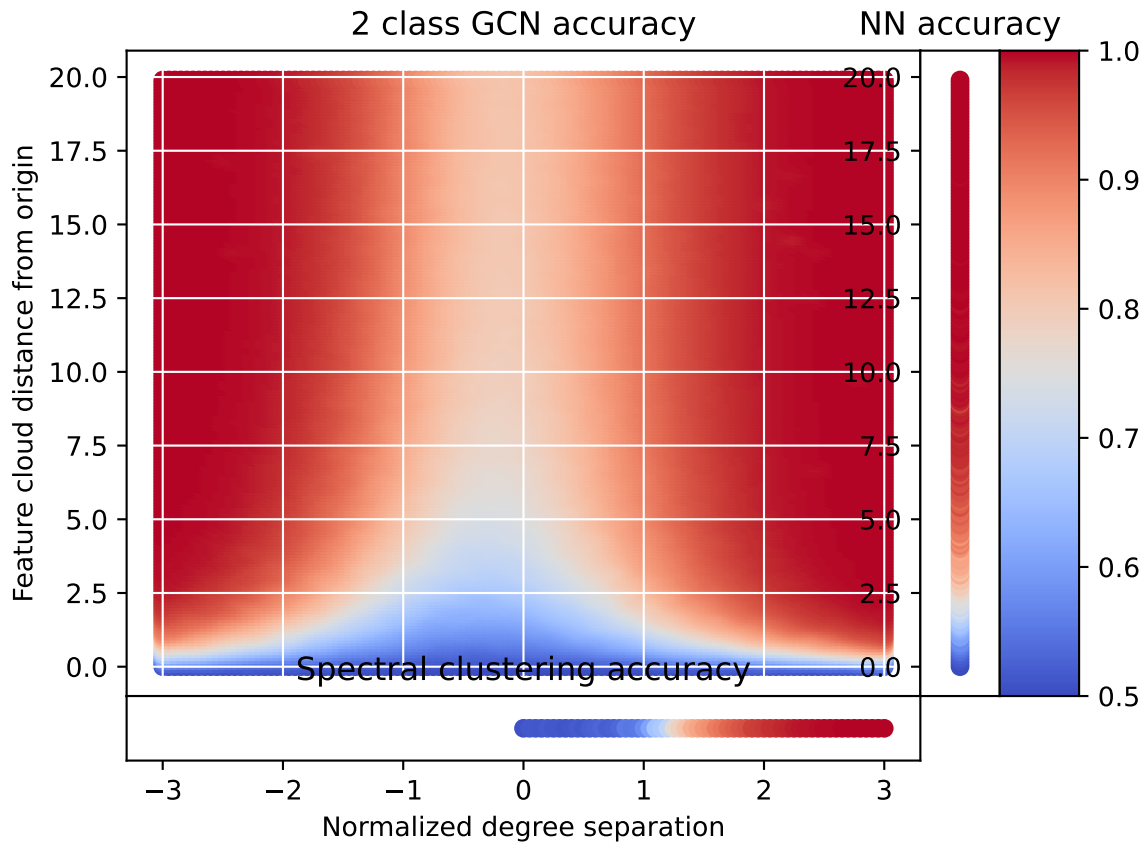

Supplement: supplementary_material [file attachment]

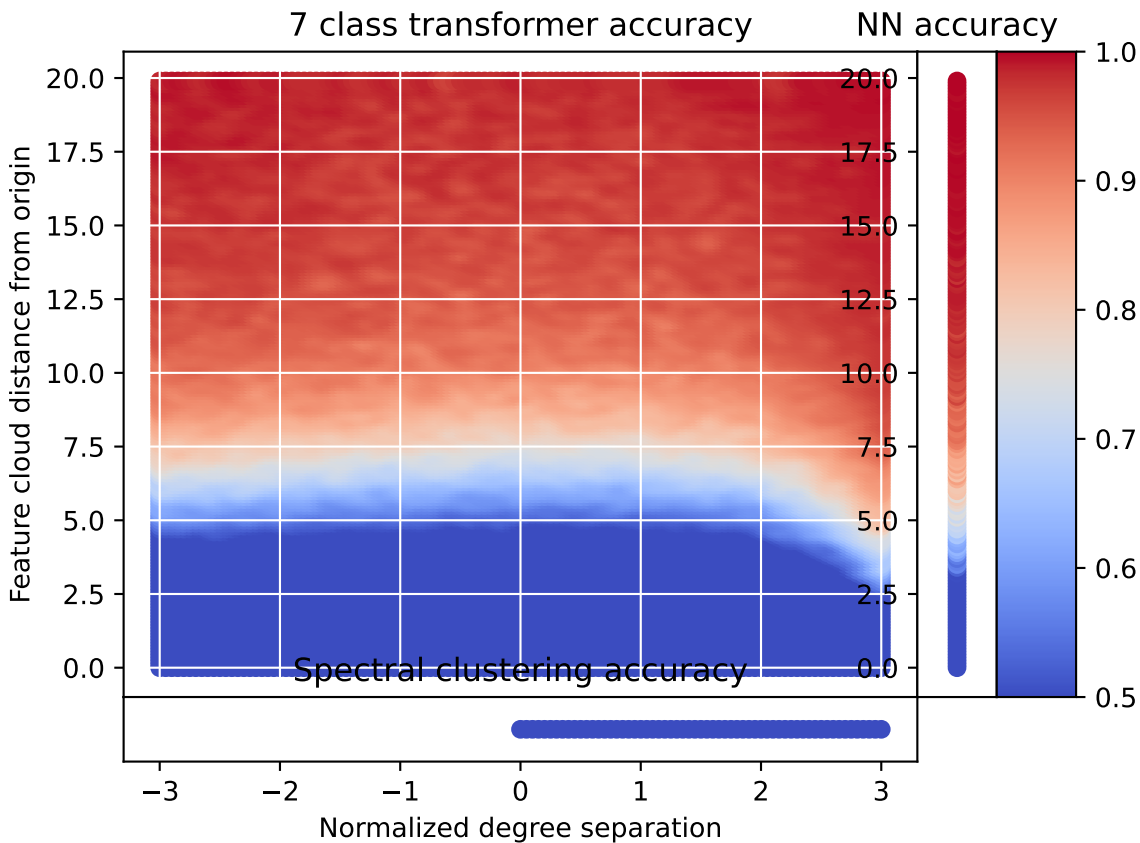

Supplement: supplementary_material [file attachment]

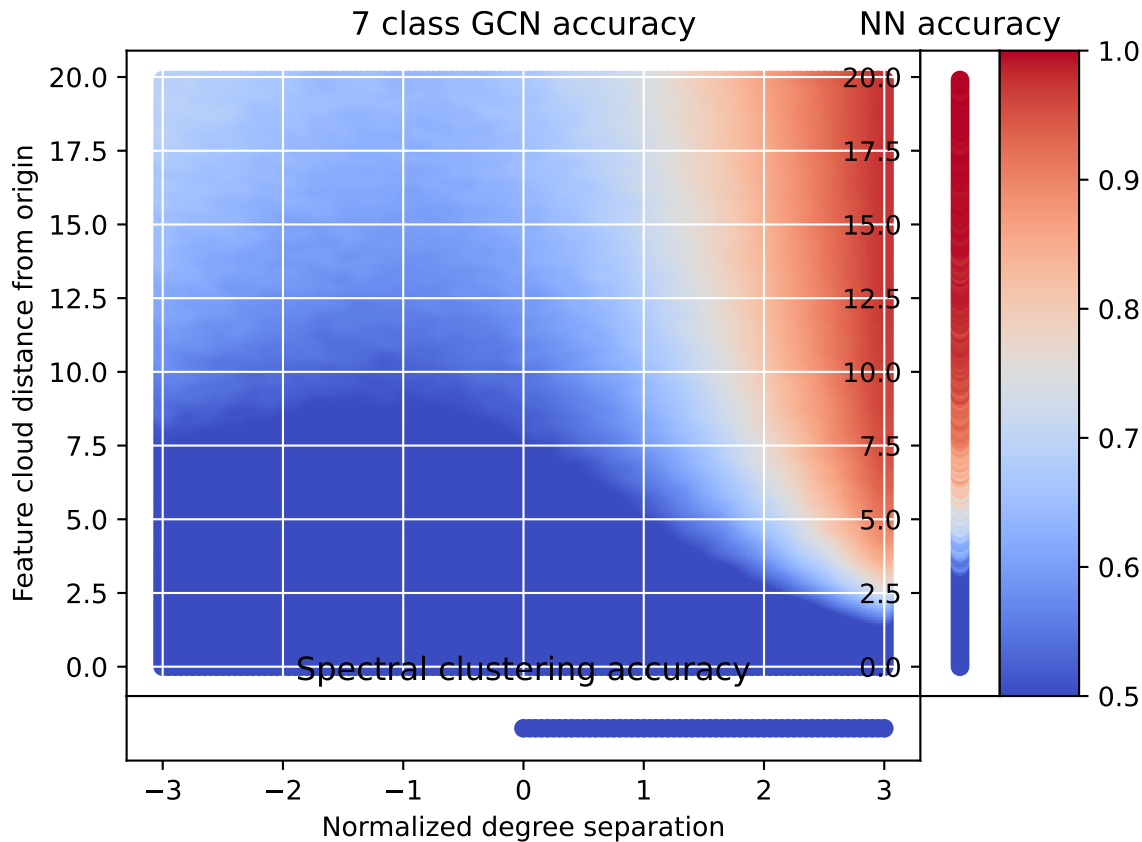

Supplement: supplementary_material [file attachment]

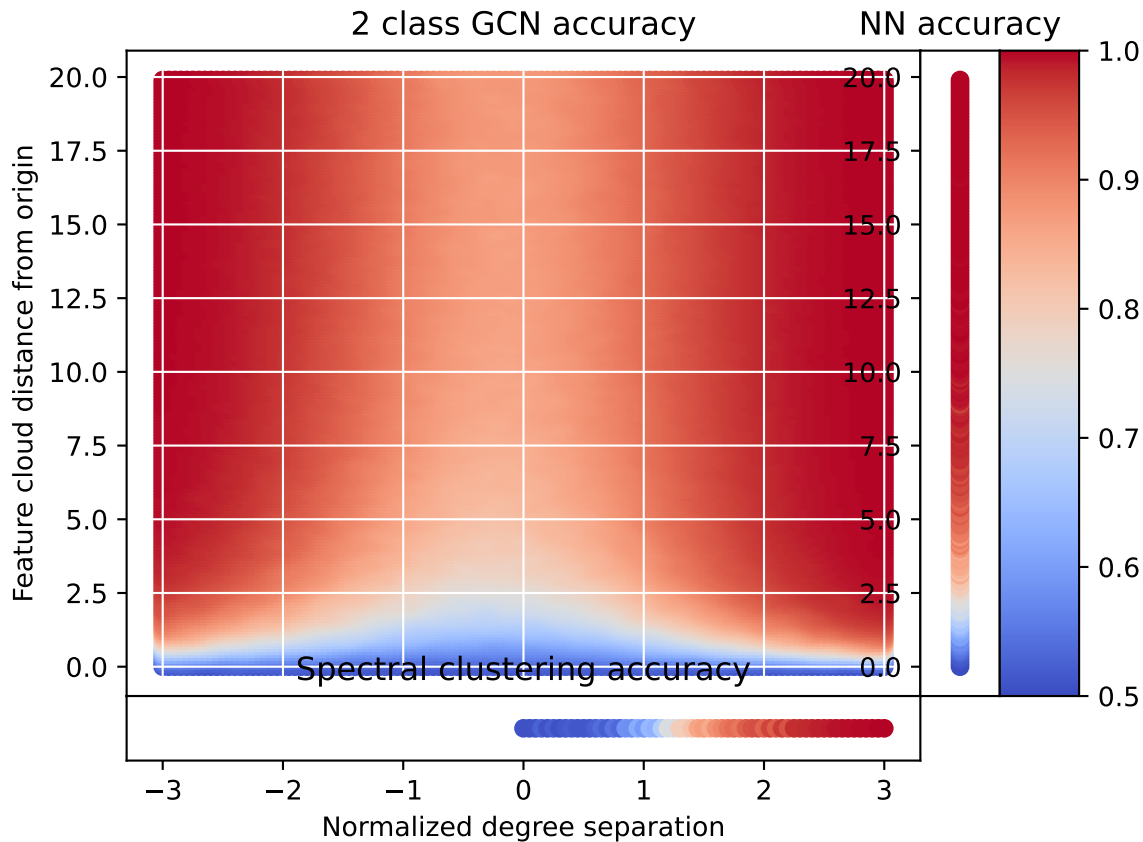

Supplement: supplementary_material [file attachment]

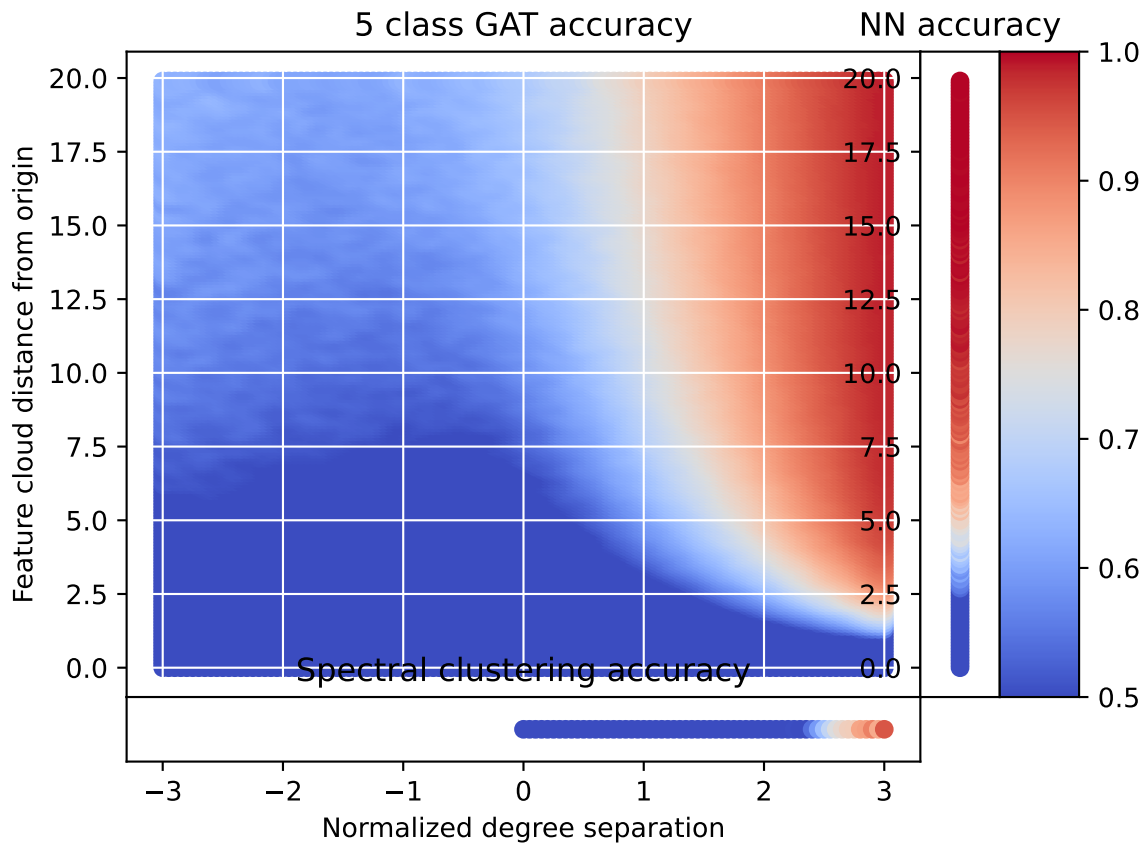

Supplement: supplementary_material [file attachment]

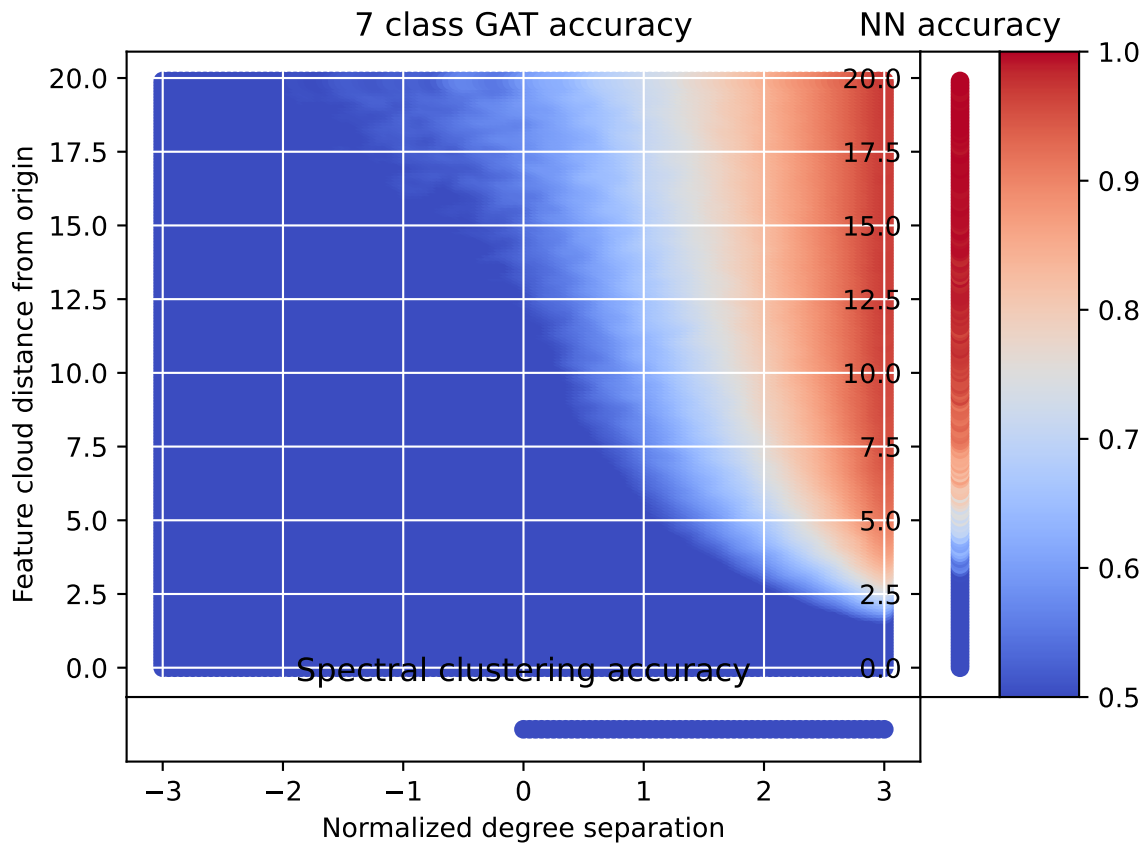

Supplement: supplementary_material [file attachment]

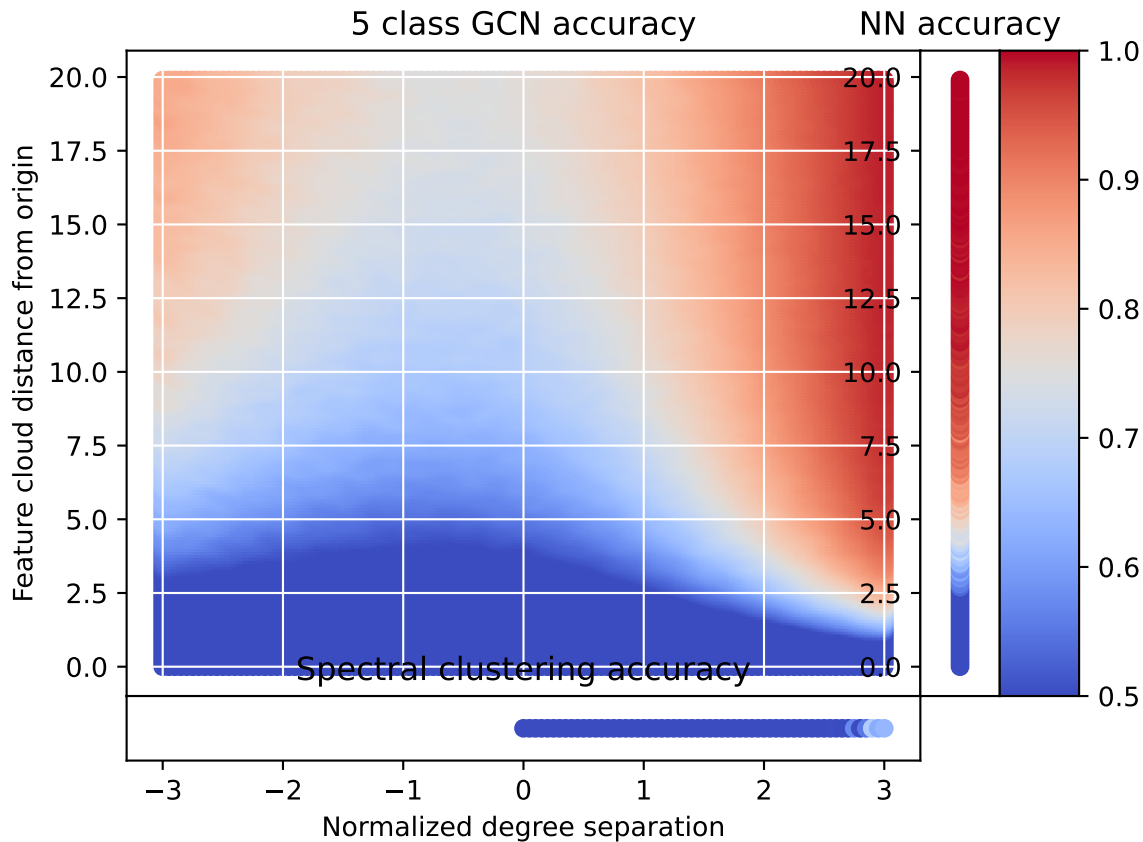

Supplement: supplementary_material [file attachment]

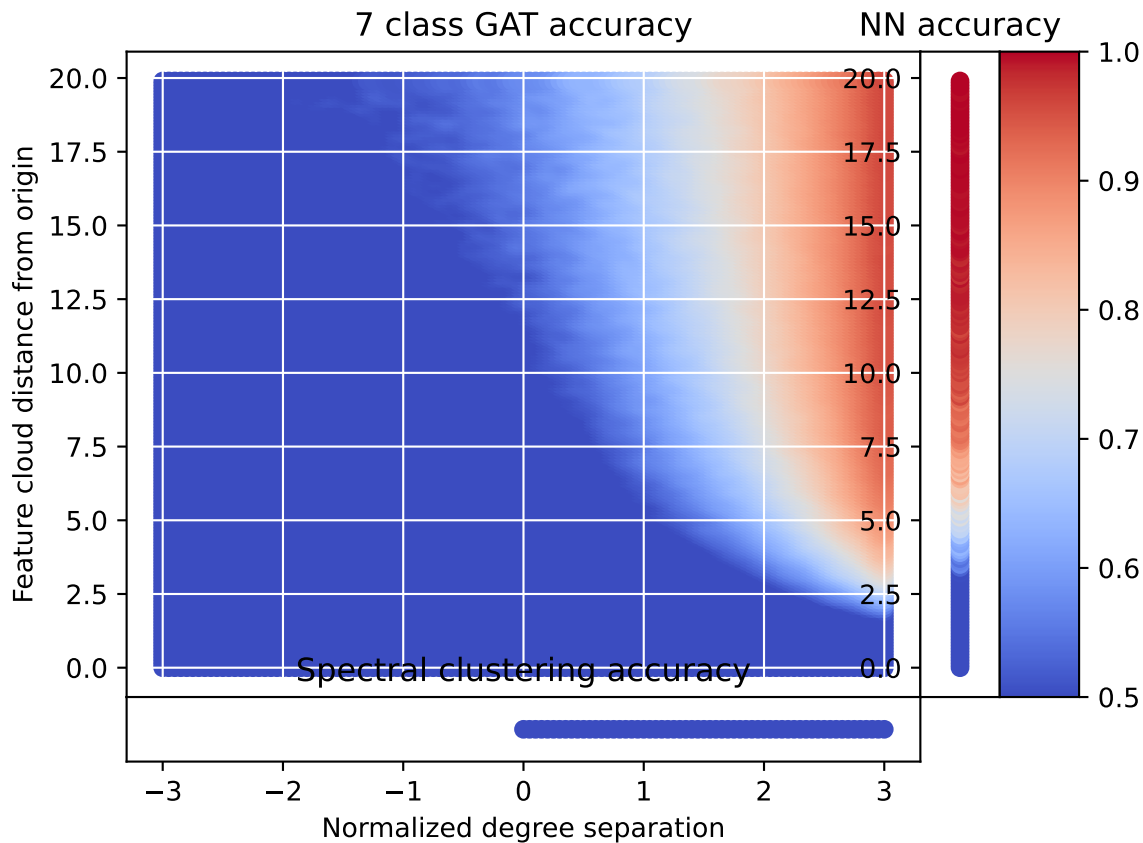

Supplement: supplementary_material [file attachment]

7 class SAGE accuracy

NN accuracy

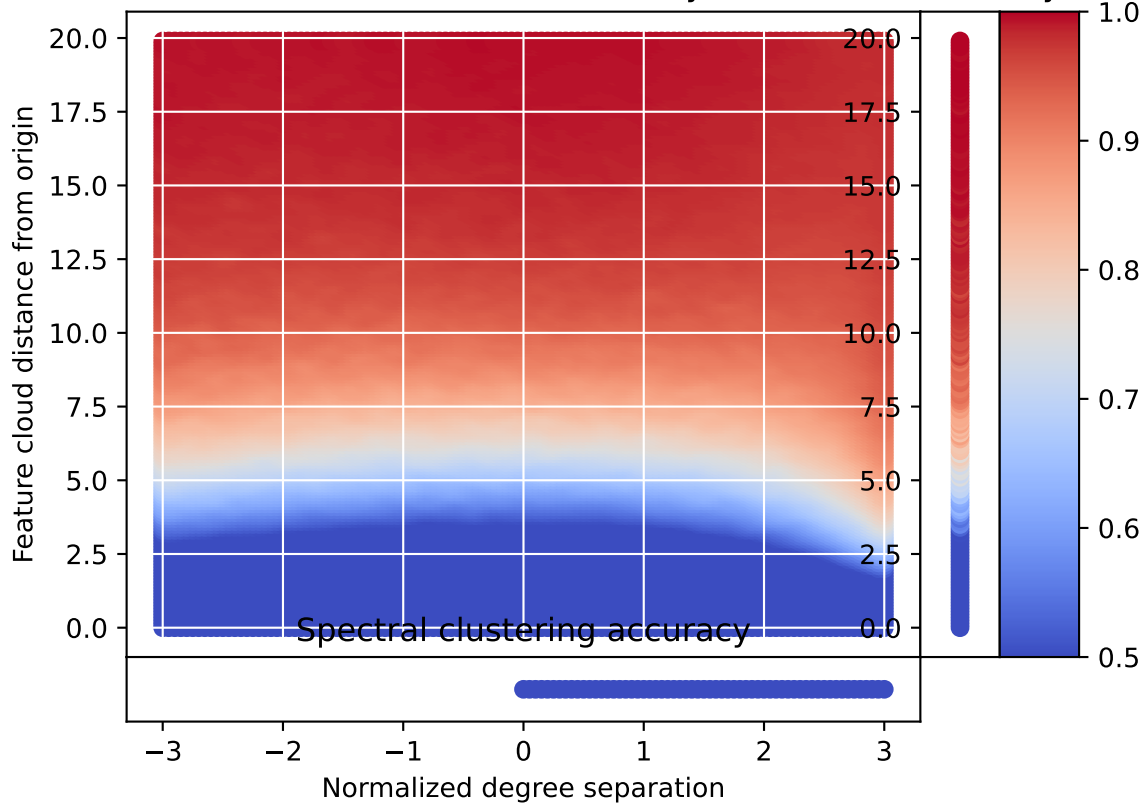

Supplement: supplementary_material [file attachment]

5 class SAGE accuracy

NN accuracy

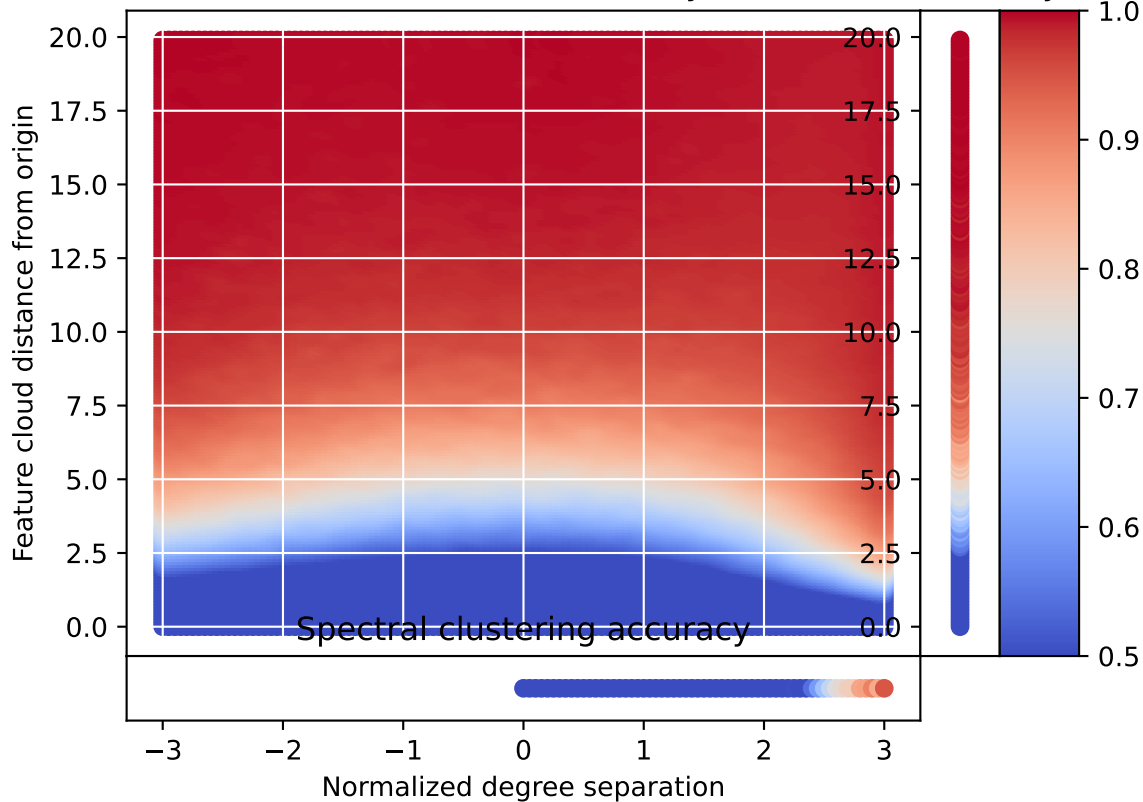

Supplement: supplementary_material [file attachment]

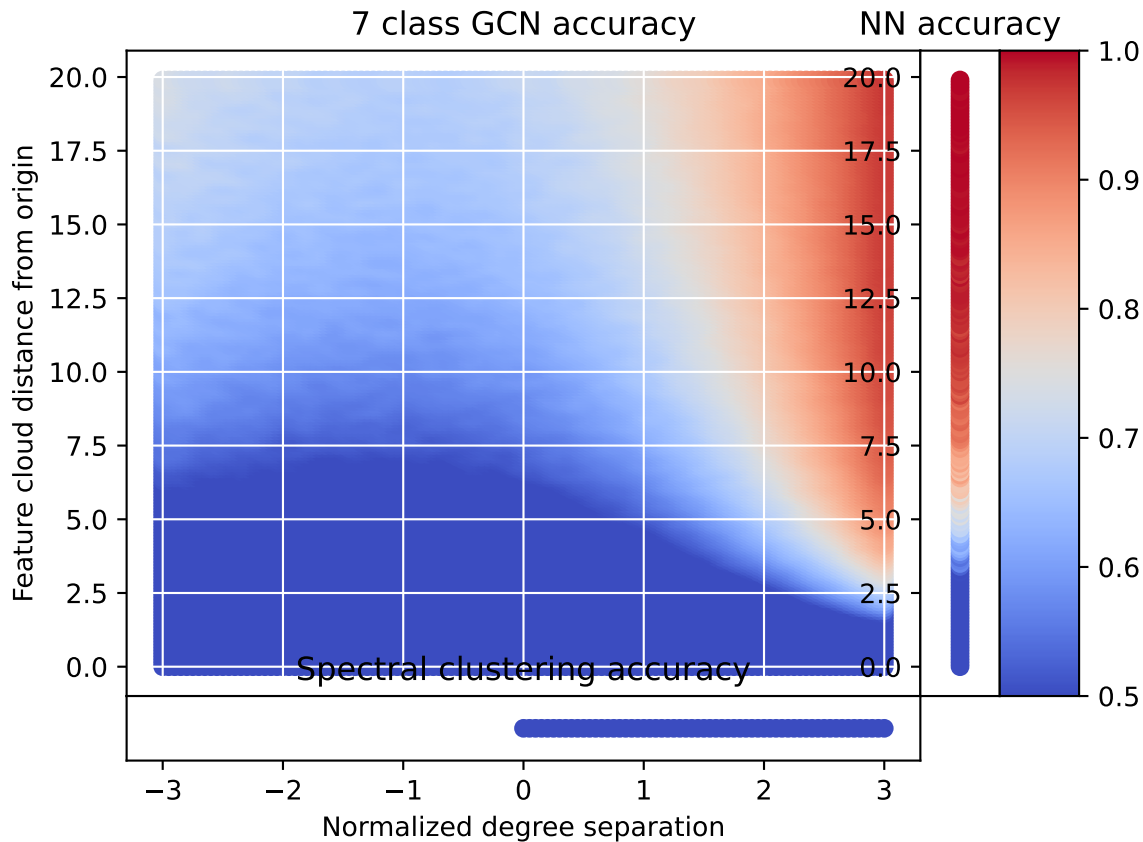

Supplement: supplementary_material [file attachment]

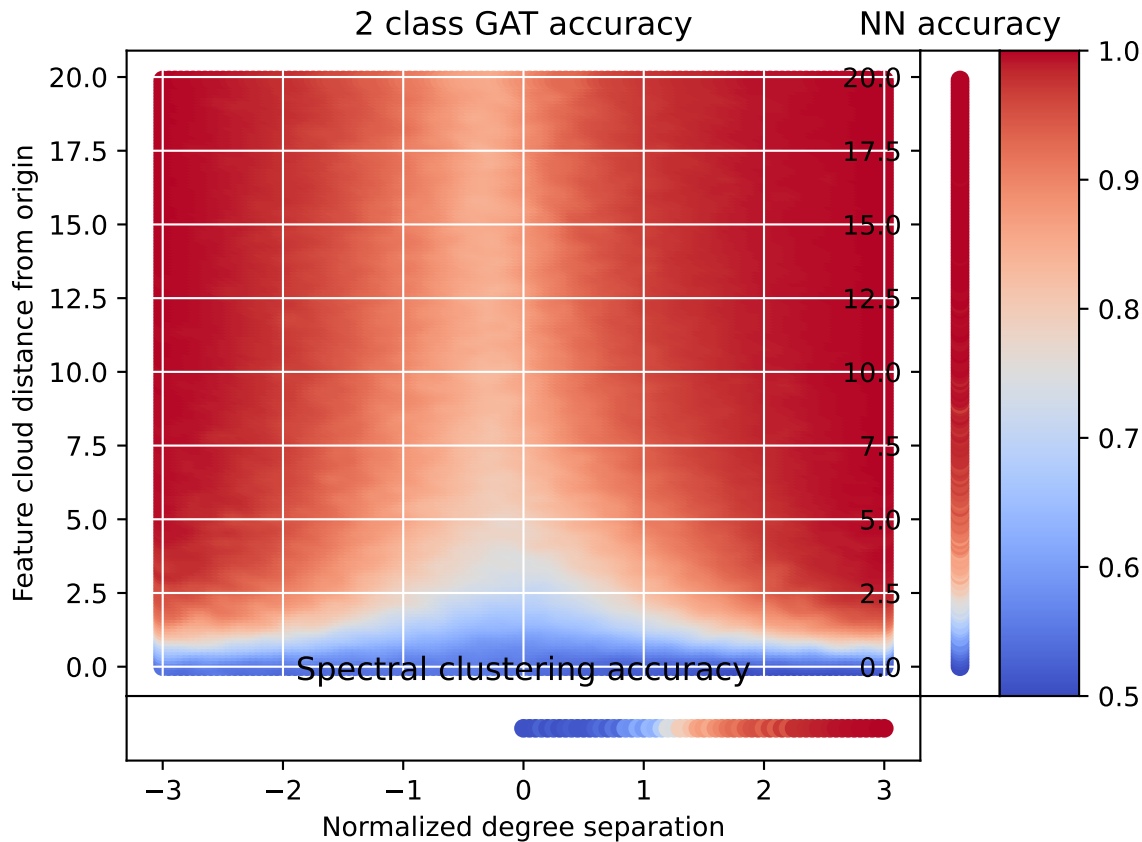

Supplement: supplementary_material [file attachment]

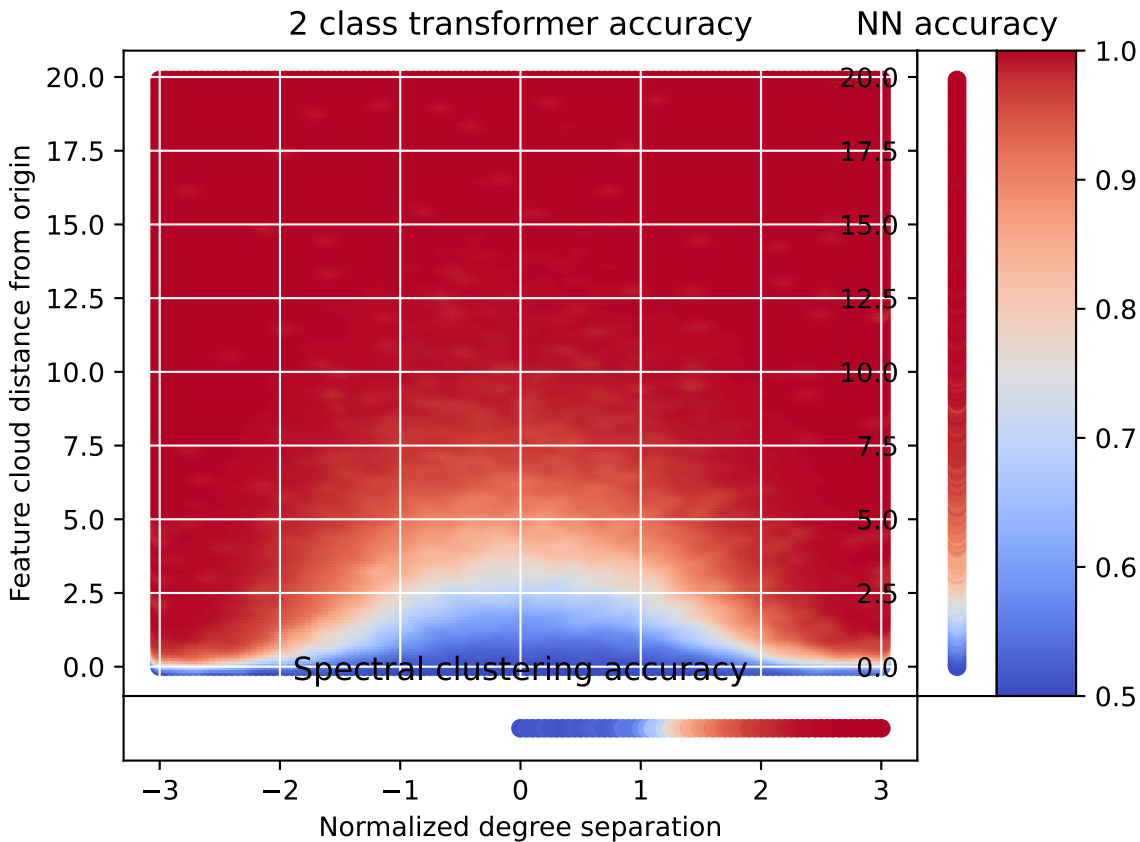

Supplement: supplementary_material [file attachment]

2 class SAGE accuracy

NN accuracy

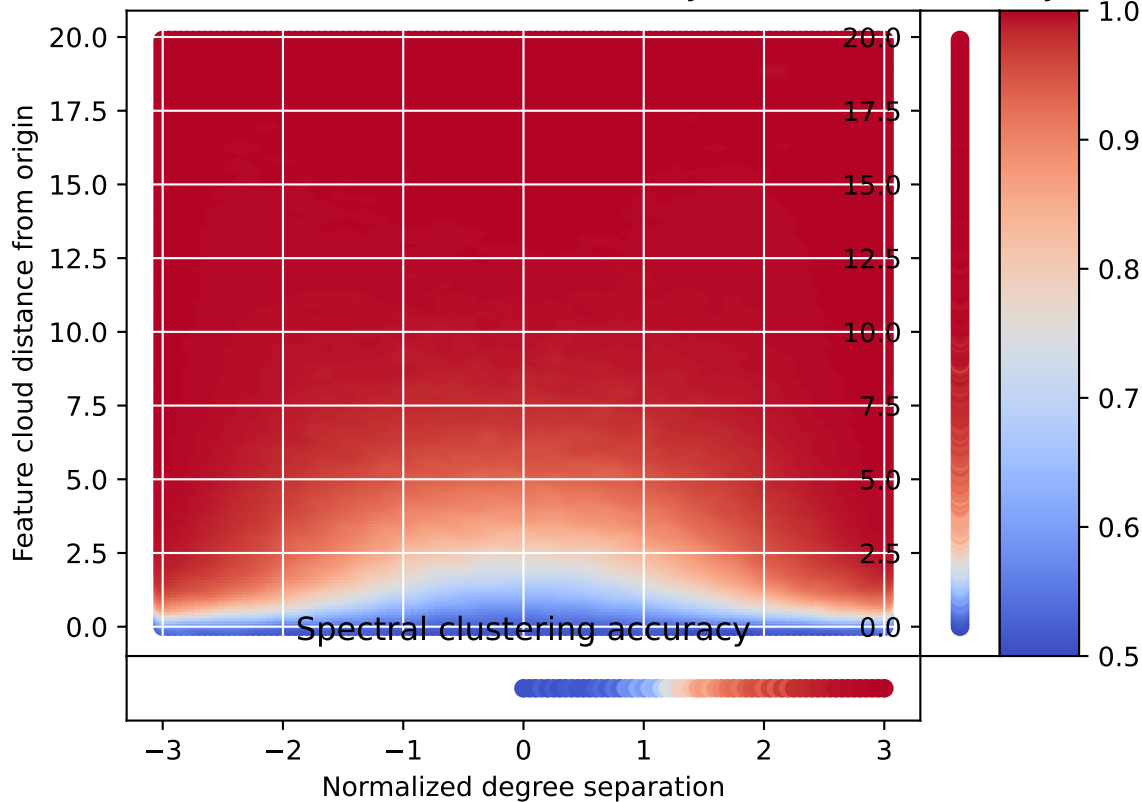

Supplement: supplementary_material [file attachment]

7 class SAGE accuracy

NN accuracy

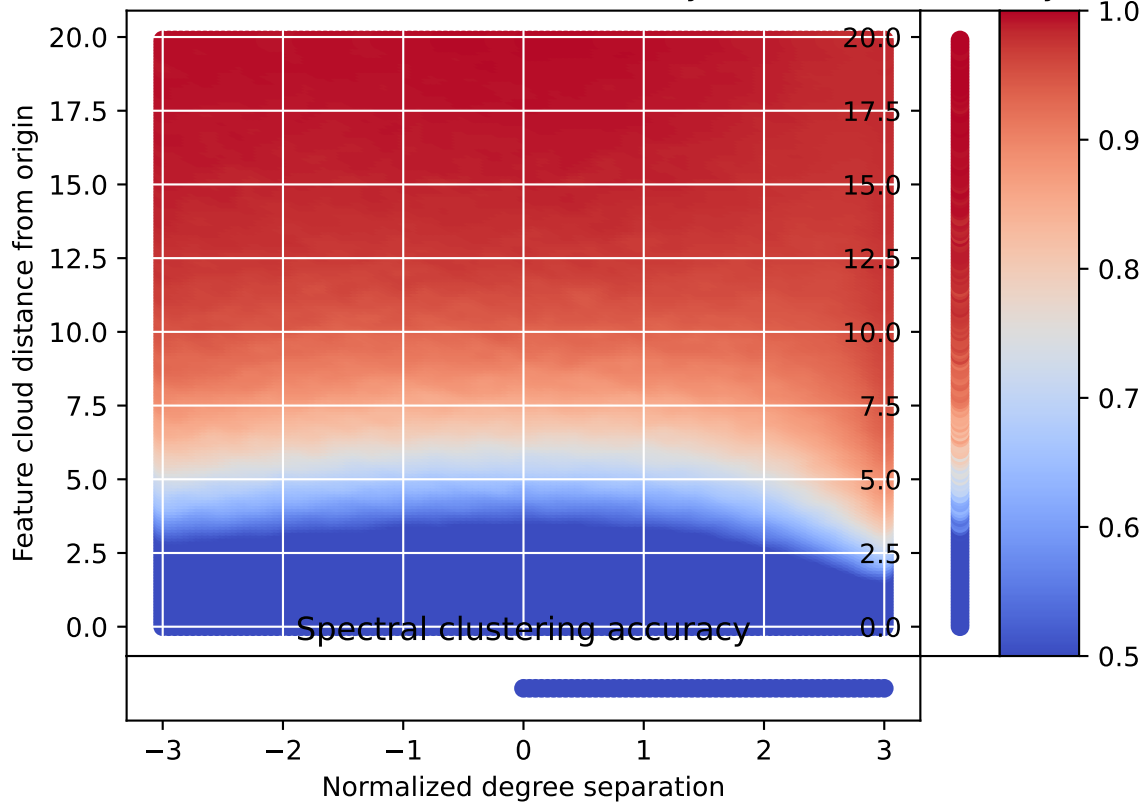

Supplement: supplementary_material [file attachment]

5 class SAGE accuracy

NN accuracy

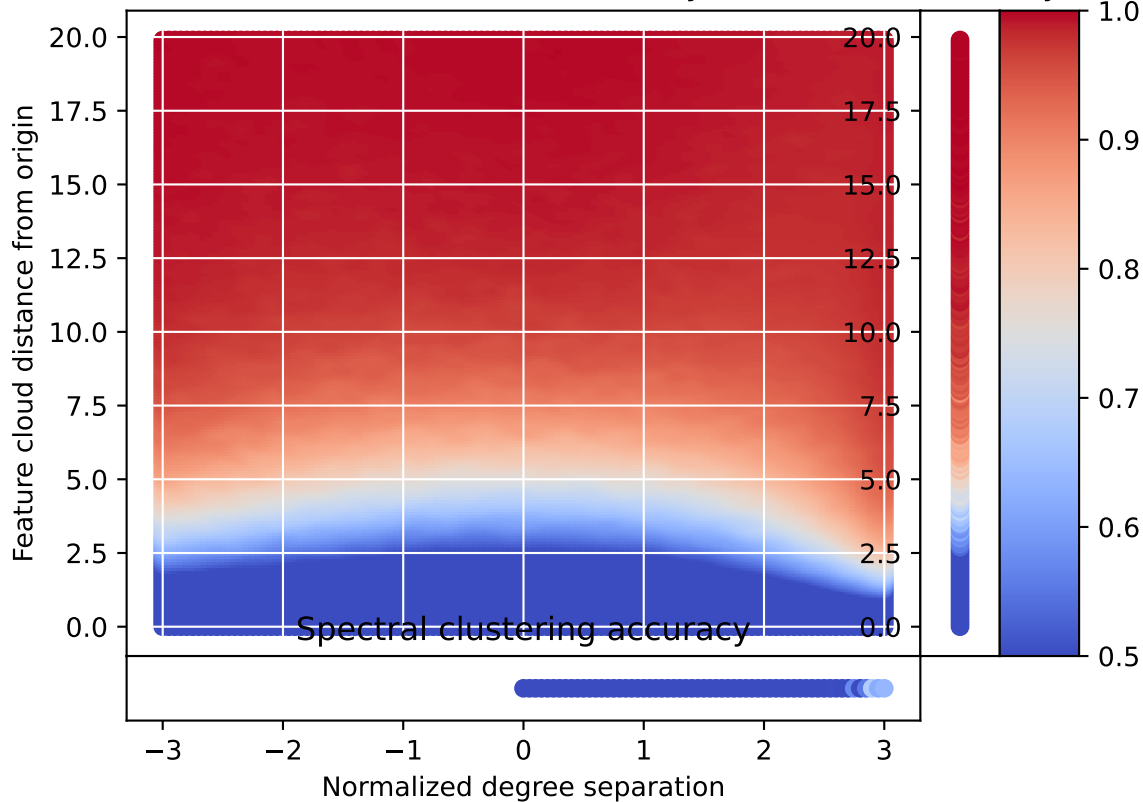

Supplement: supplementary_material [file attachment]

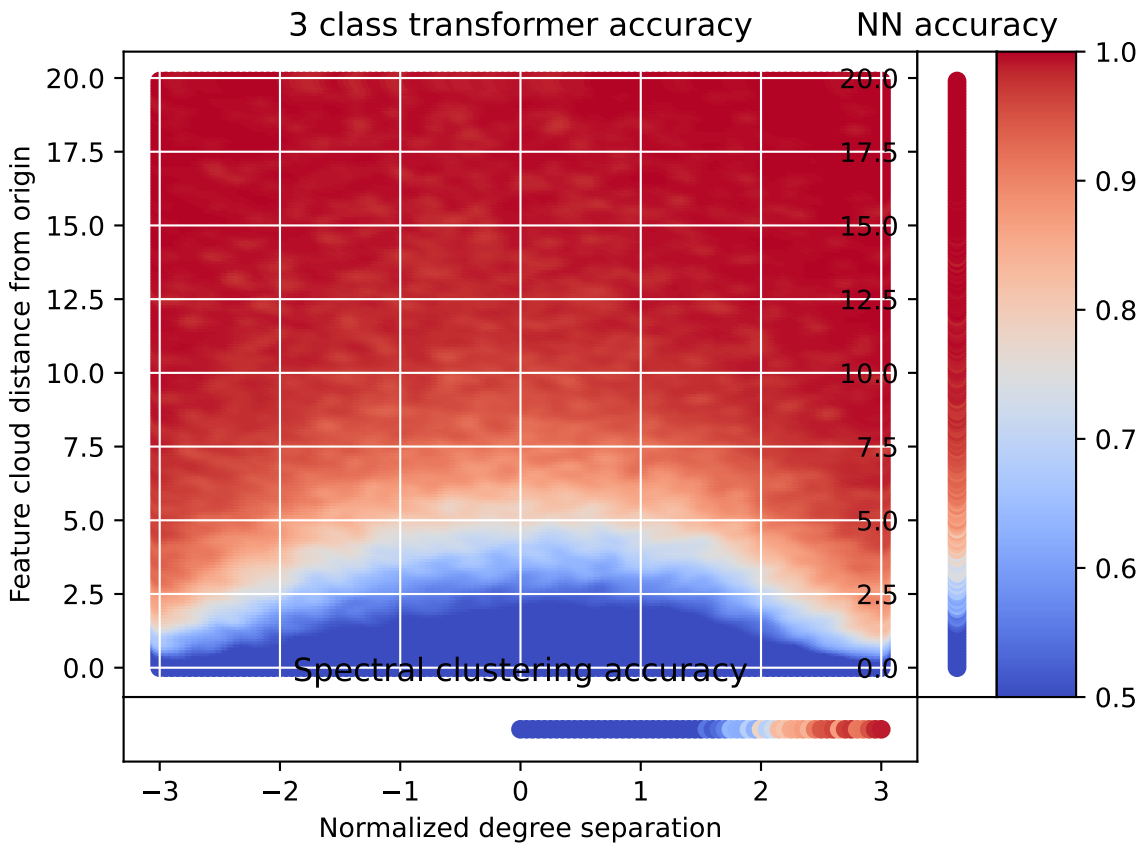

Supplement: supplementary_material [file attachment]

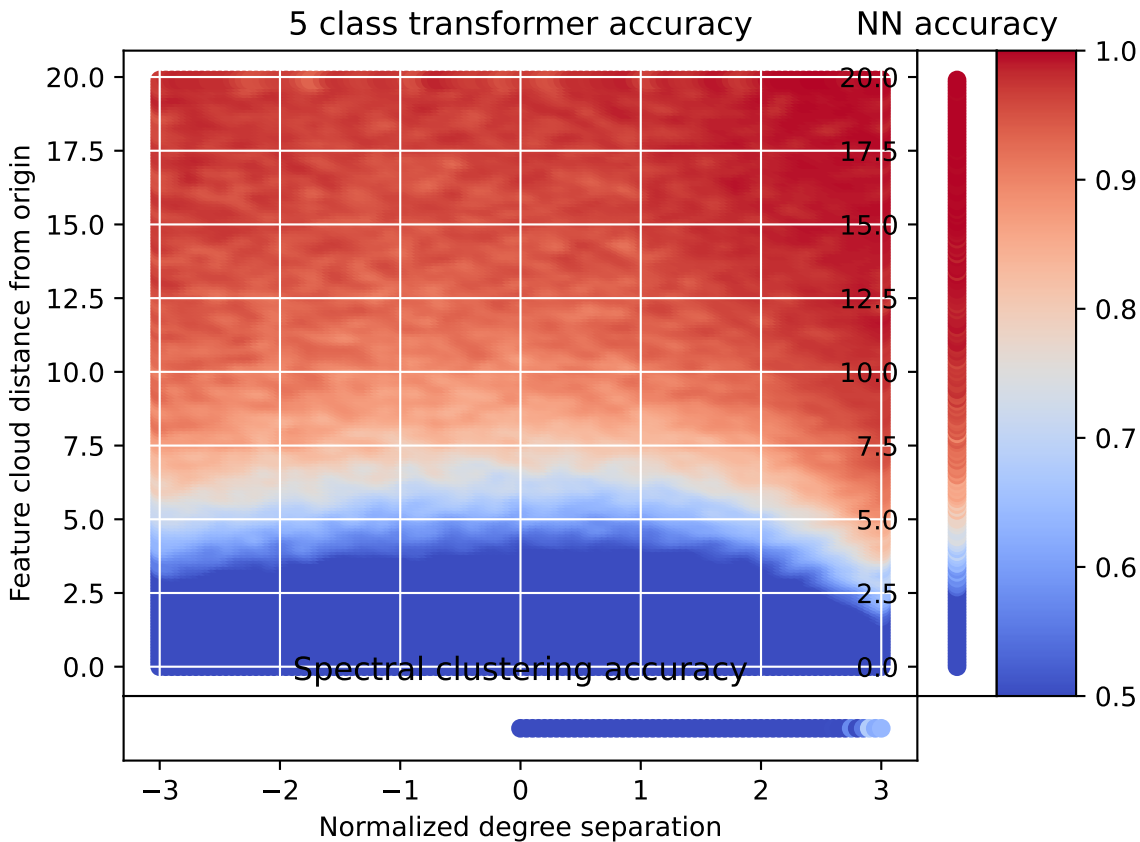

Supplement: supplementary_material [file attachment]

3 class SAGE accuracy

NN accuracy

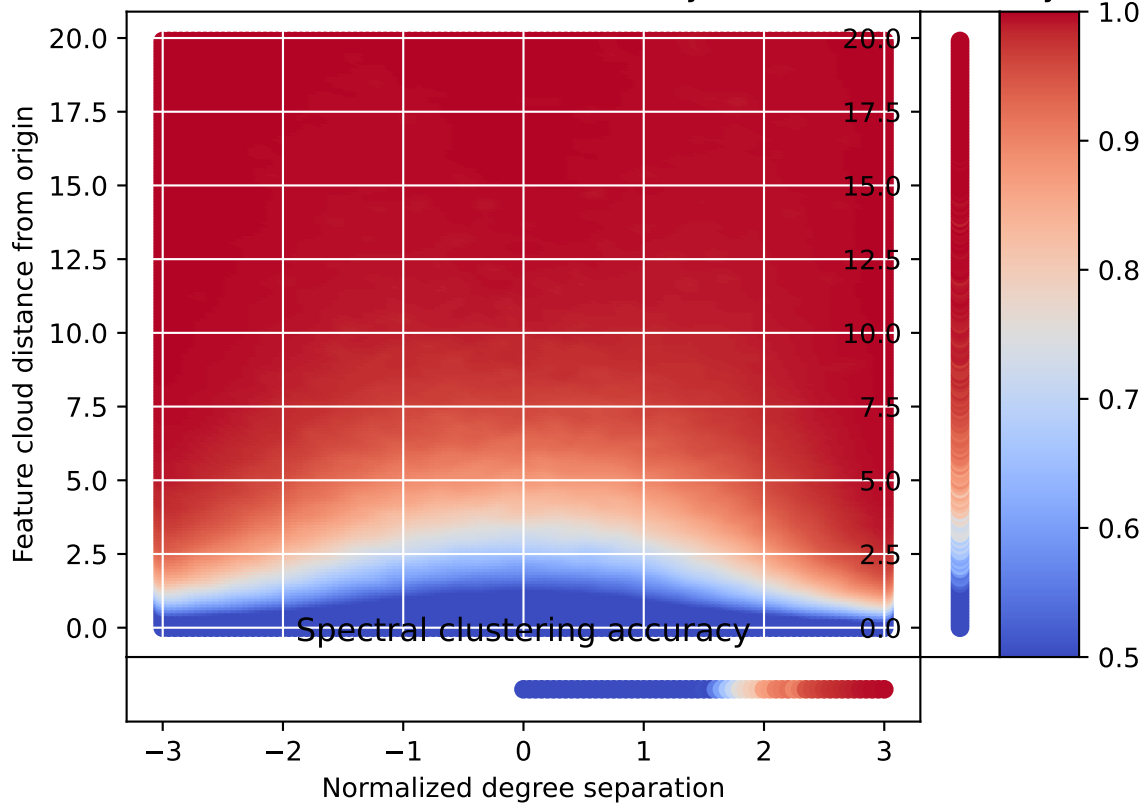

Supplement: supplementary_material [file attachment]

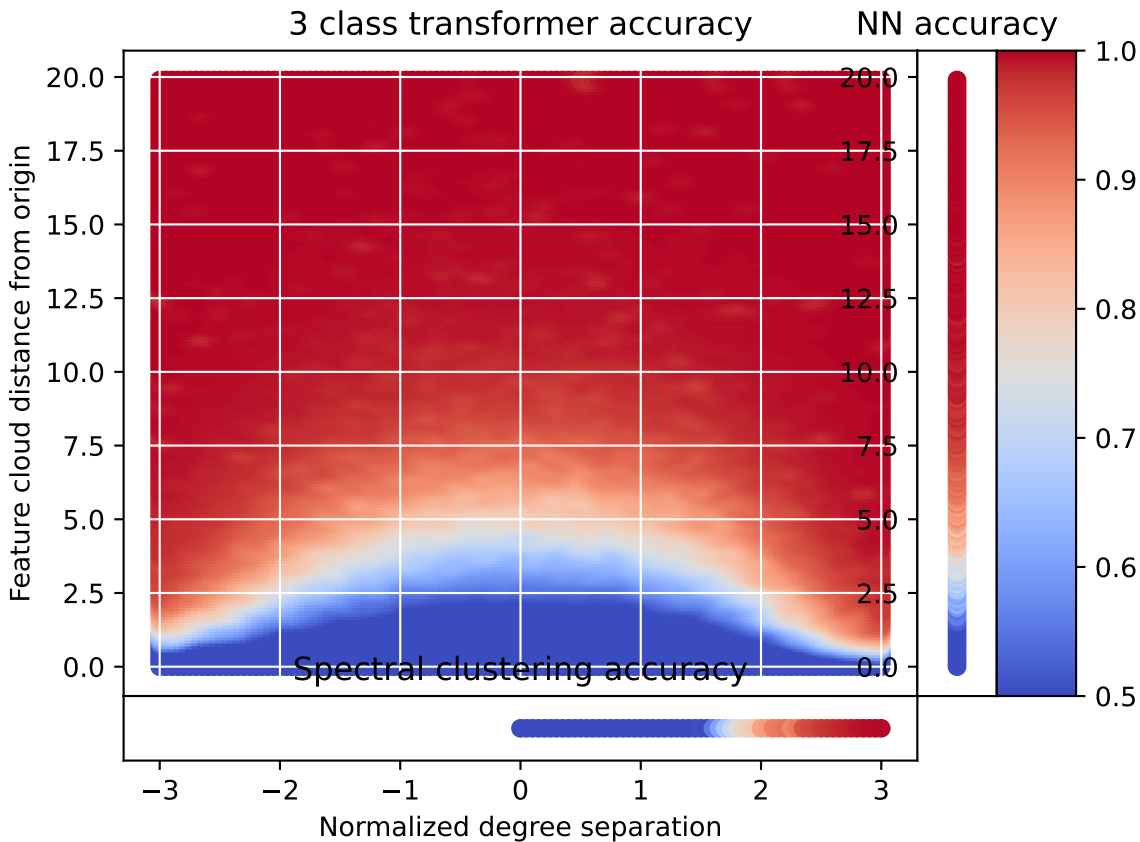

Supplement: supplementary_material [file attachment]

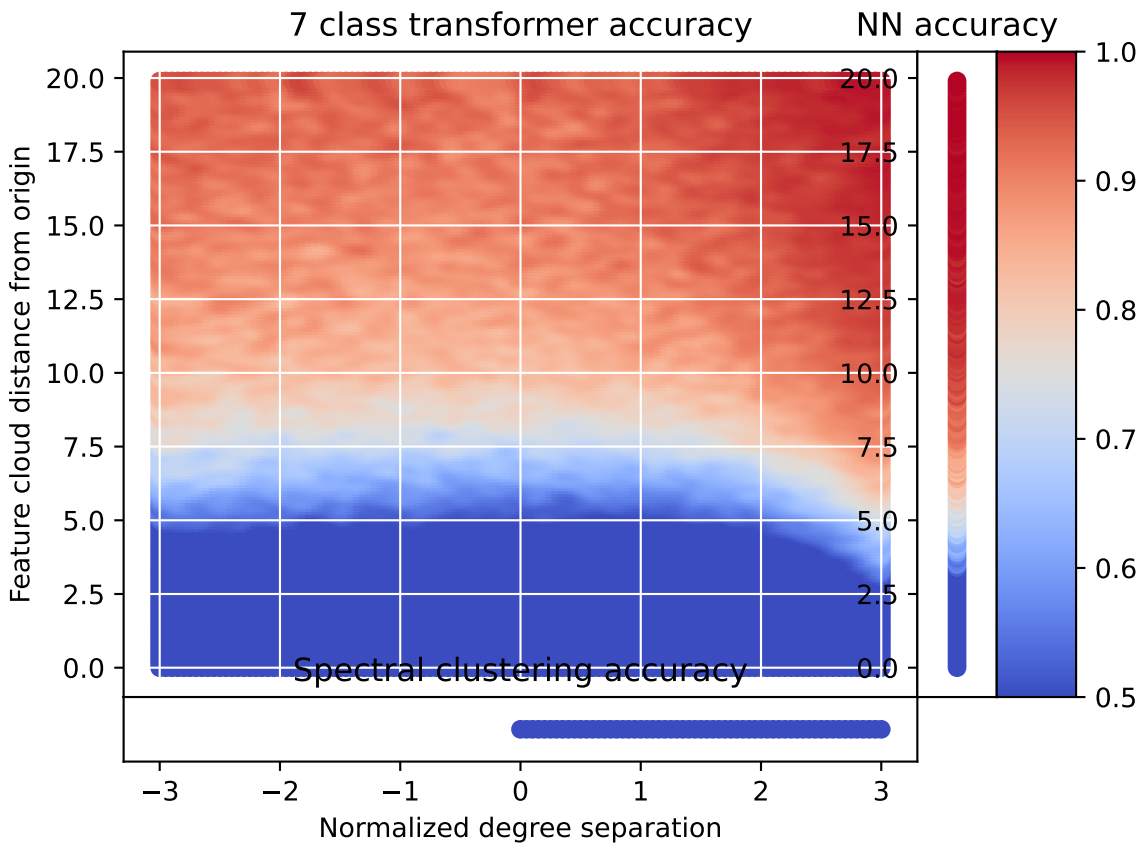

Supplement: supplementary_material [file attachment]

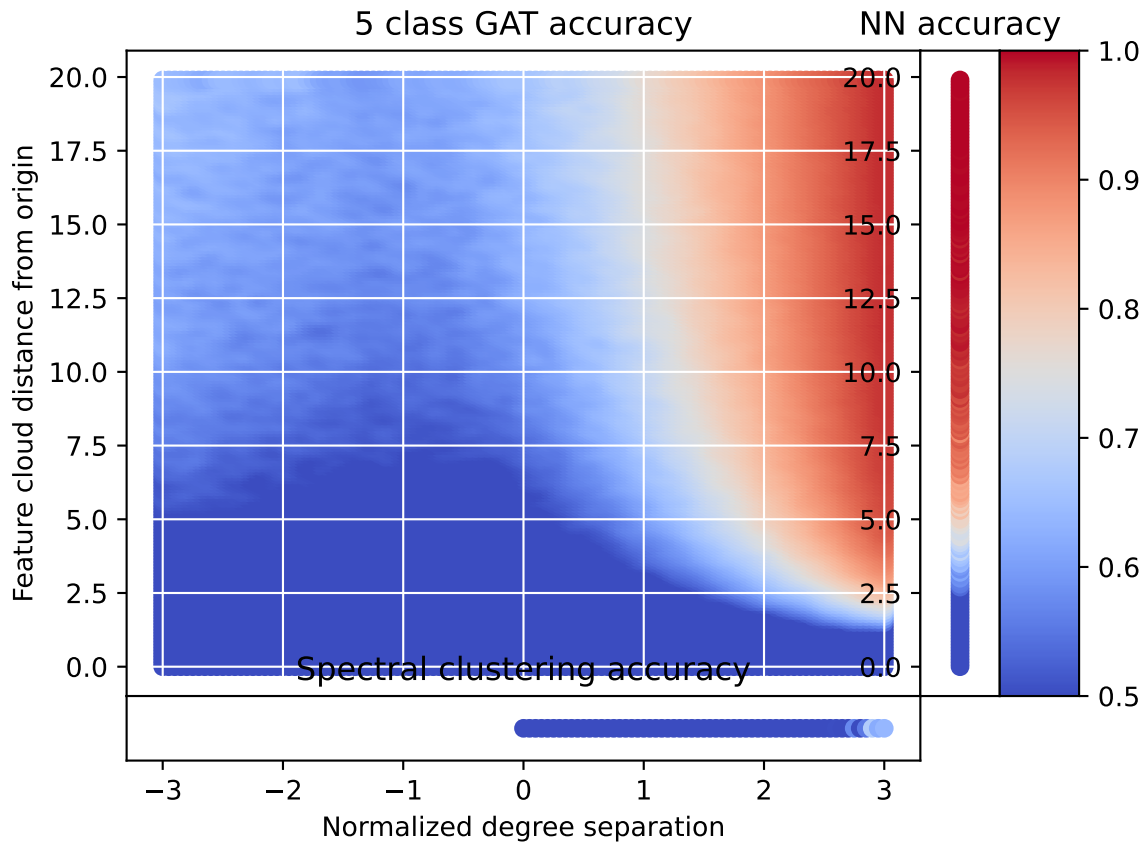

Supplement: supplementary_material [file attachment]

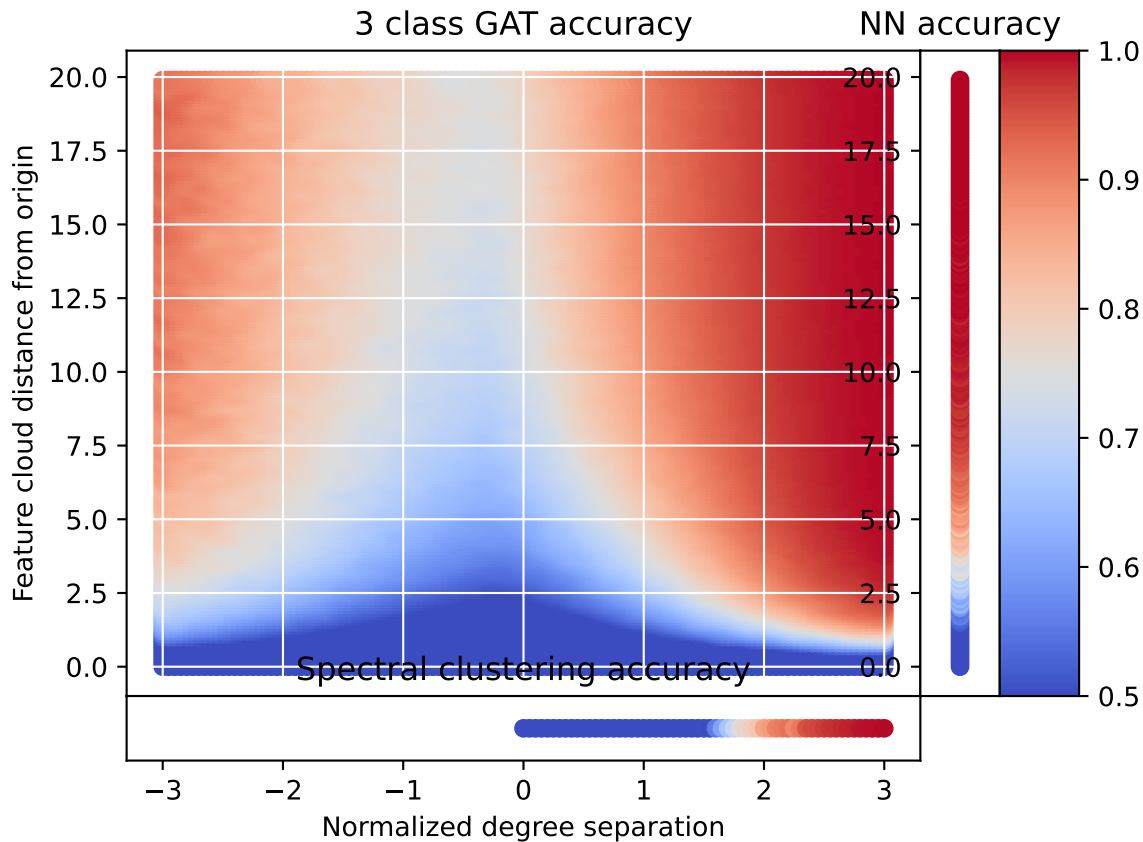

Supplement: supplementary_material [file attachment]

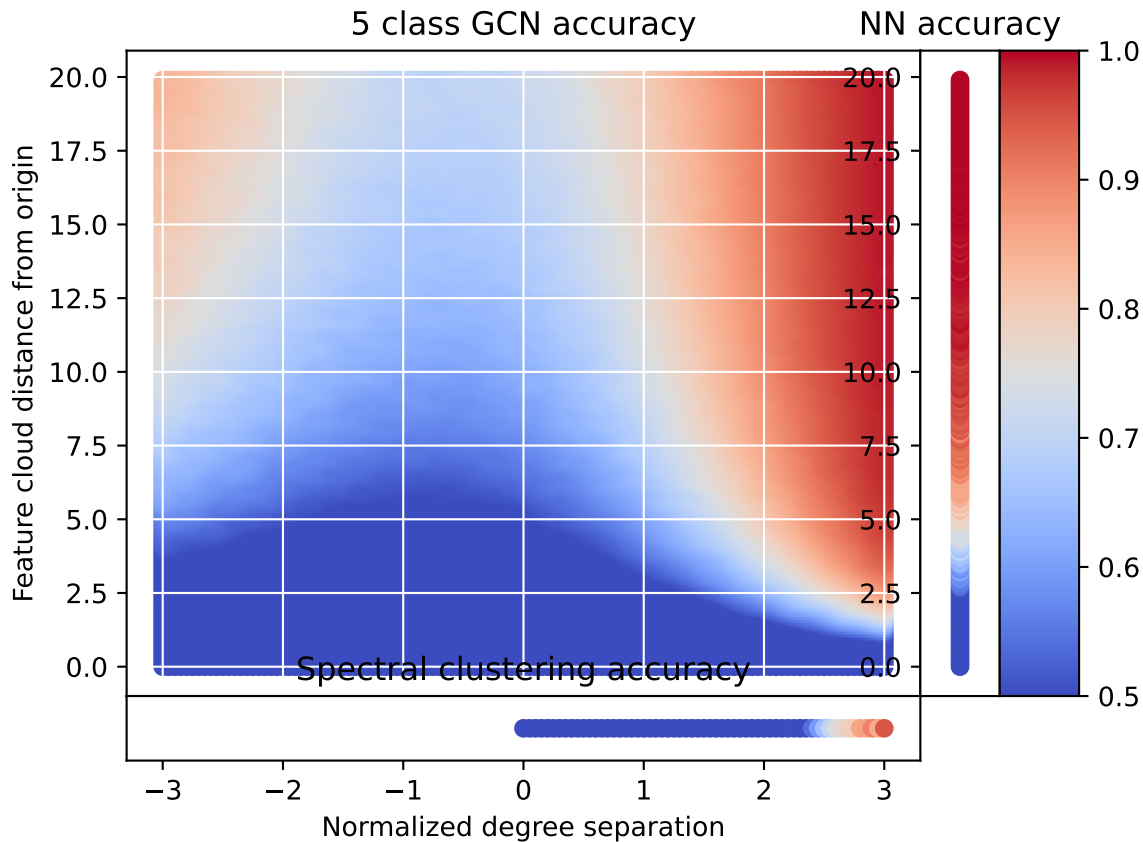

Supplement: supplementary_material [file attachment]

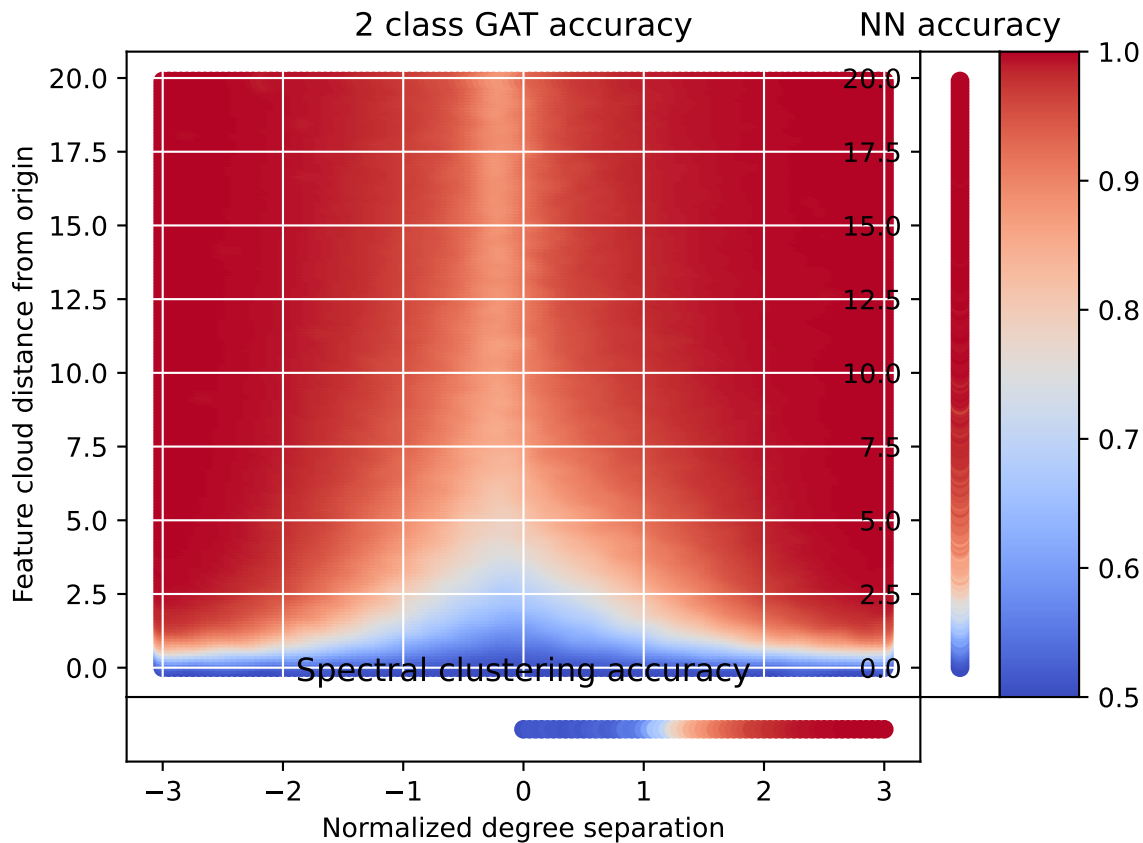

Supplement: supplementary_material [file attachment]

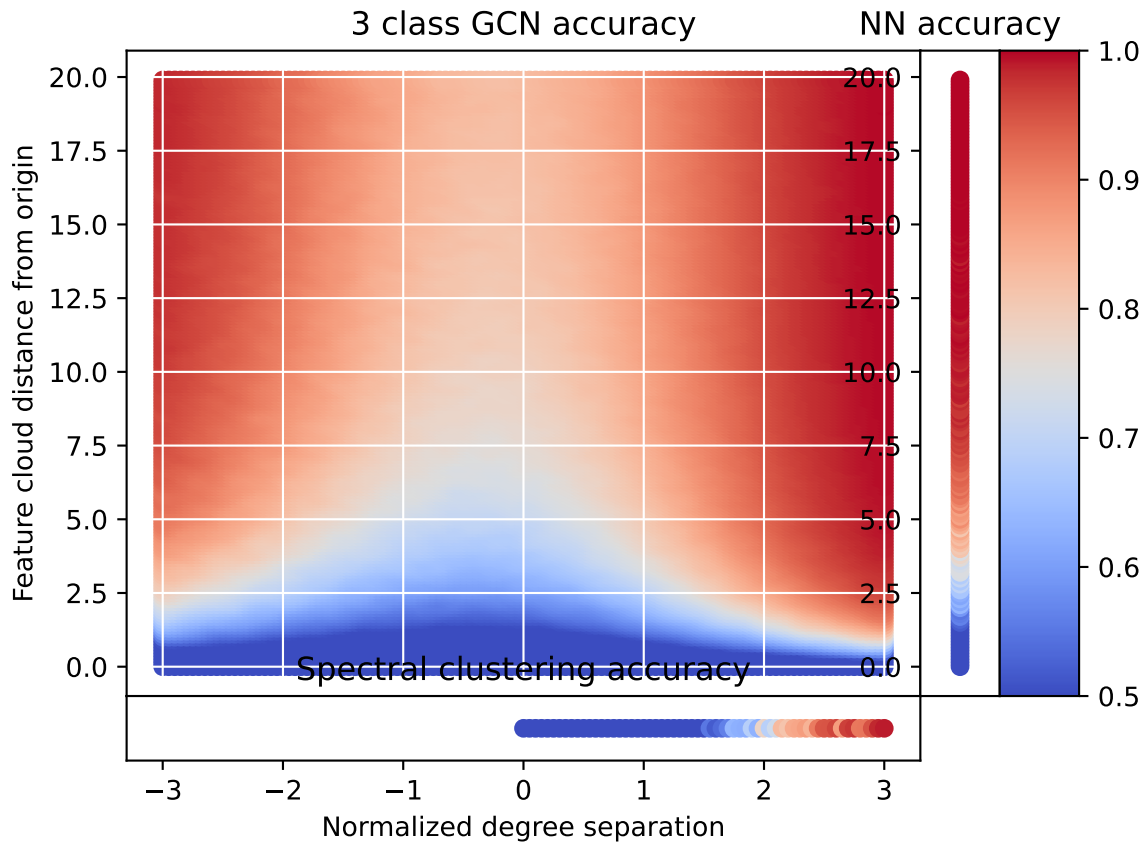

Supplement: supplementary_material [file attachment]

2 class SAGE accuracy

NN accuracy

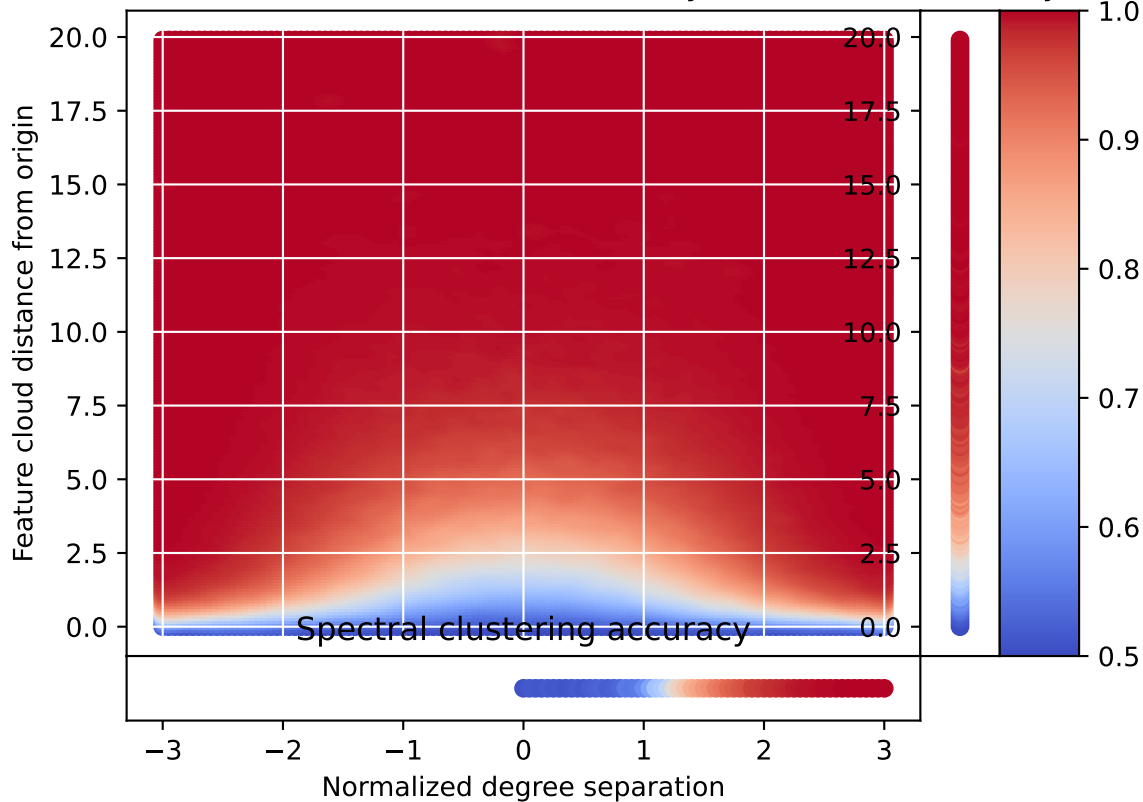

Supplement: supplementary_material [file attachment]

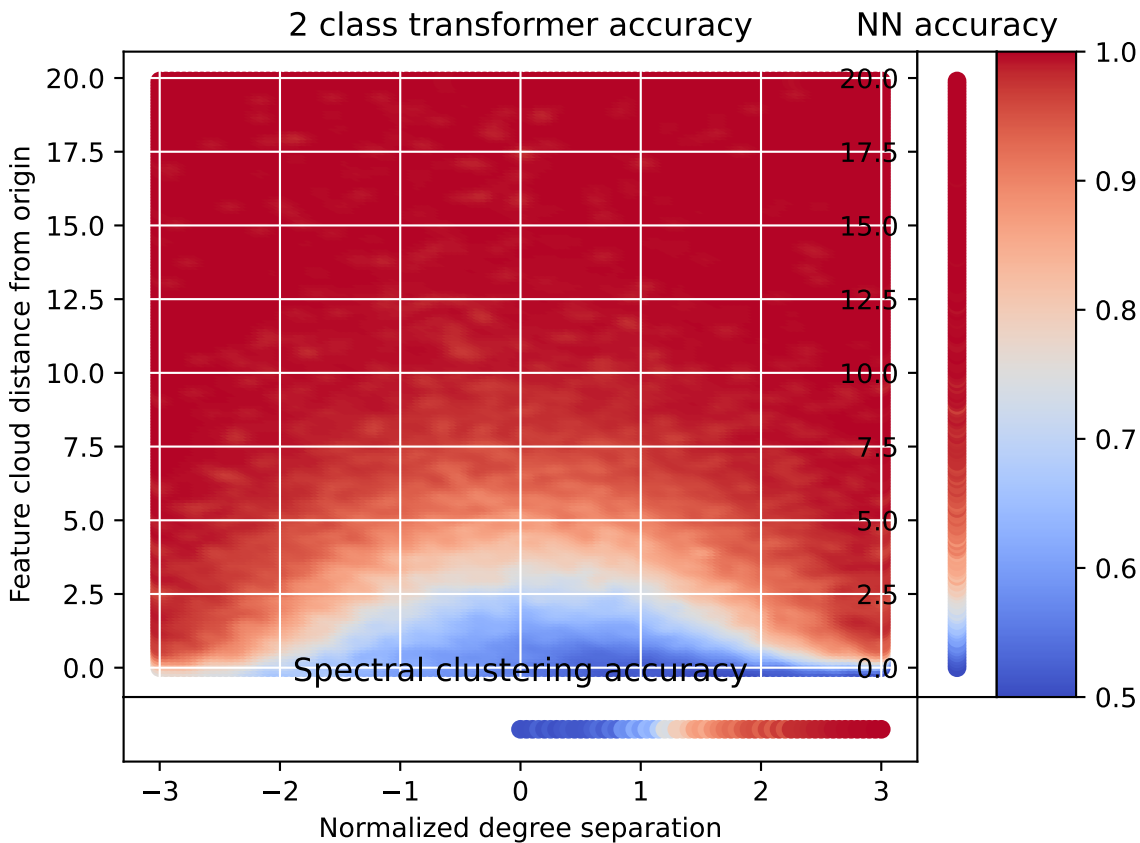

Supplement: supplementary_material [file attachment]

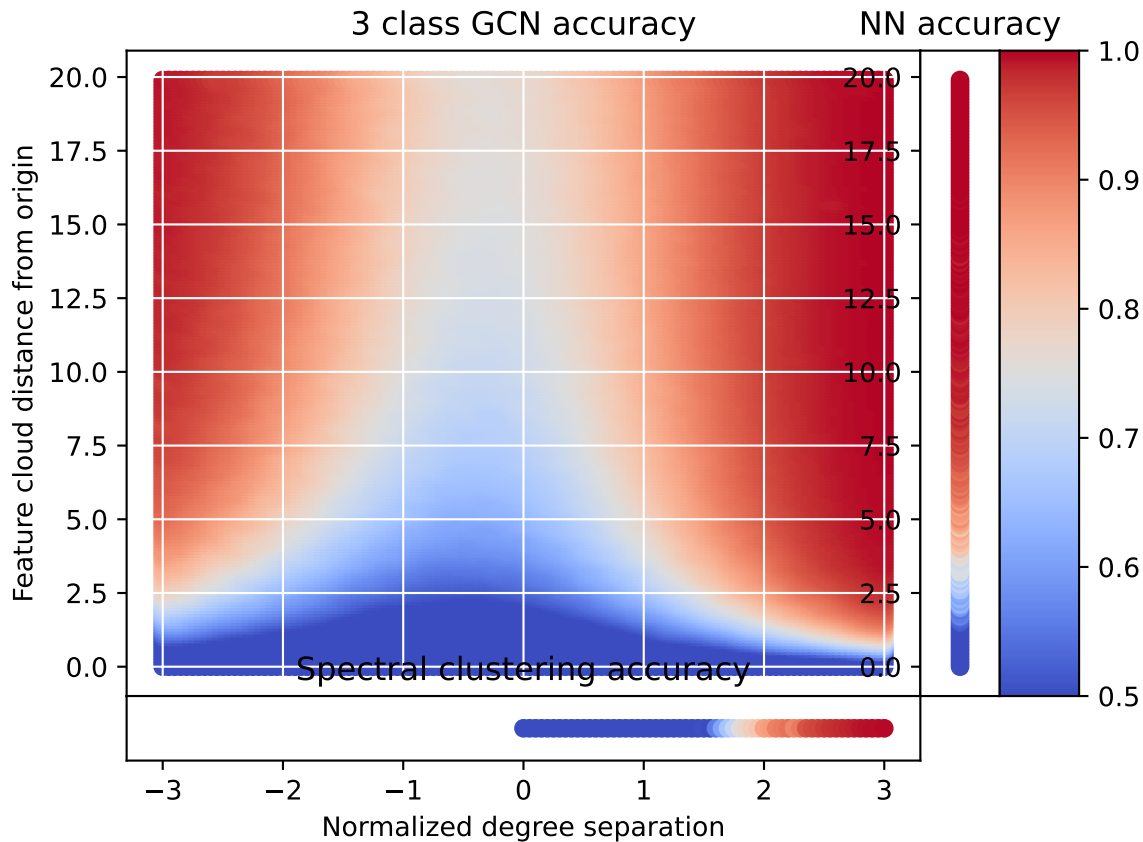

Supplement: supplementary_material [file attachment]

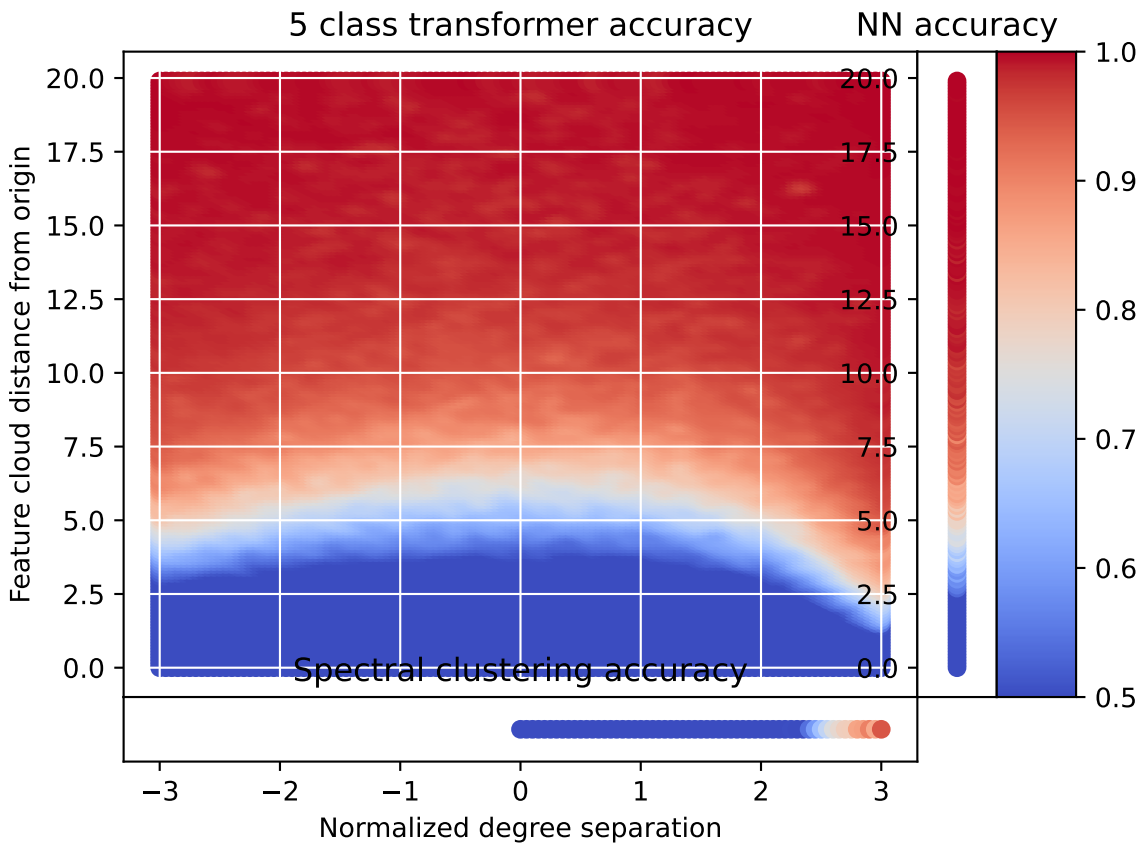

Supplement: supplementary_material [file attachment]

3 class SAGE accuracy

NN accuracy

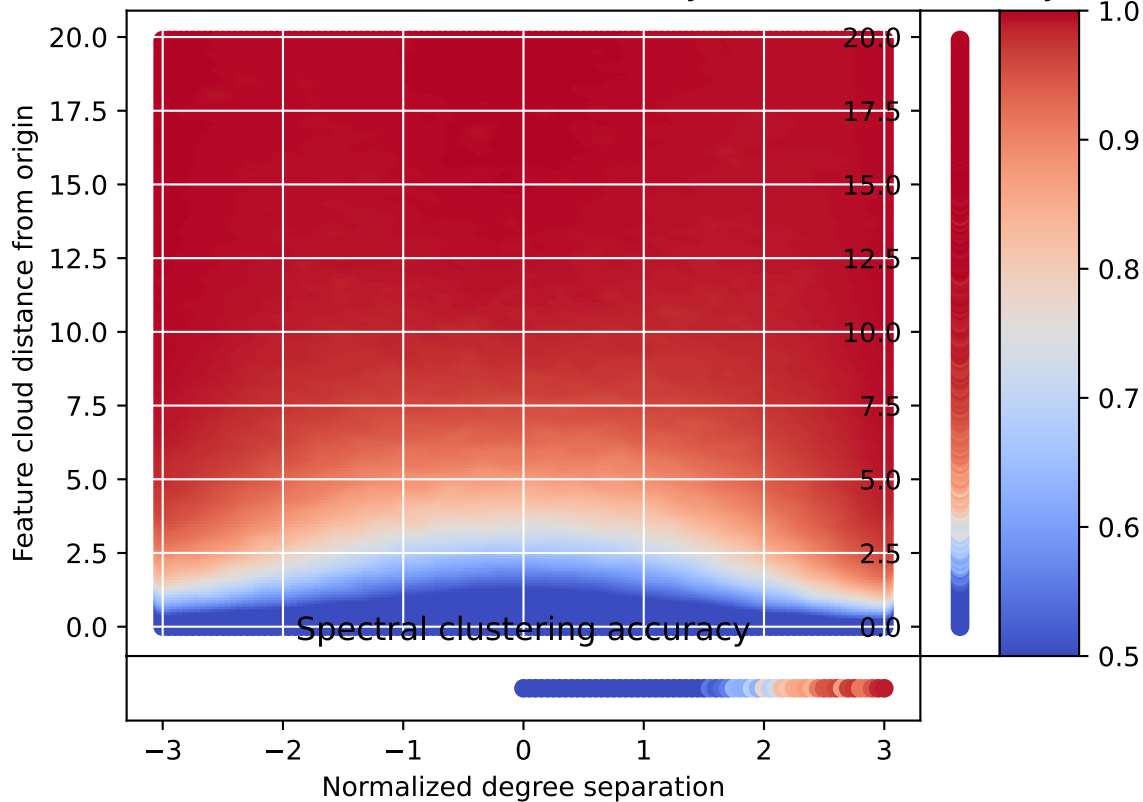

Supplement: supplementary_material [file attachment]
